# Supplementary material for: Synthesis and characterization of iodovanadinite using PdI2, an iodine source for the immobilisation of radioiodine
Source: Royal Society of Chemistry journal article supplement (doi:10.1039/d0ra04114a), 2020-01-01
Supplement: d0ra04114a1.pdf [file d0ra04114a1.pdf]

# Synthesis and characterization of lead iodovanadinite using $\text{PdI}_2$ , an iodine source for the immobilisation of radioiodine

E. V. Johnstone,<sup>a,b</sup> D. J. Bailey,<sup>a</sup> S. Lawson,<sup>a</sup> M. C. Stennett,<sup>a</sup> C. L. Corkhill,<sup>a</sup>

M. Kim,<sup>a,c,d</sup> J. Heo,<sup>c,d</sup> D. Matsumura,<sup>e</sup> N. C. Hyatt<sup>a\*</sup>

<sup>a</sup> University of Sheffield, Materials Science and Engineering Department, Sheffield, S1 3JD, UK.

<sup>b</sup> Current affiliation: Innovative Fuel Solutions, LLC., North Las Vegas, NV, USA.

<sup>c</sup> Department of Materials Science and Engineering, Pohang University of Science and Technology (POSTECH), Pohang, Gyeongbuk 790-784, South Korea.

<sup>d</sup> Division of Advanced Nuclear Engineering, Pohang University of Science and Technology (POSTECH), Pohang, Gyeongbuk 790-784, South Korea.

<sup>e</sup> Materials Sciences Research Center, Japan Atomic Energy Agency, 1-1-1 Koto, Sayo, Hyogo 679-5148, Japan.

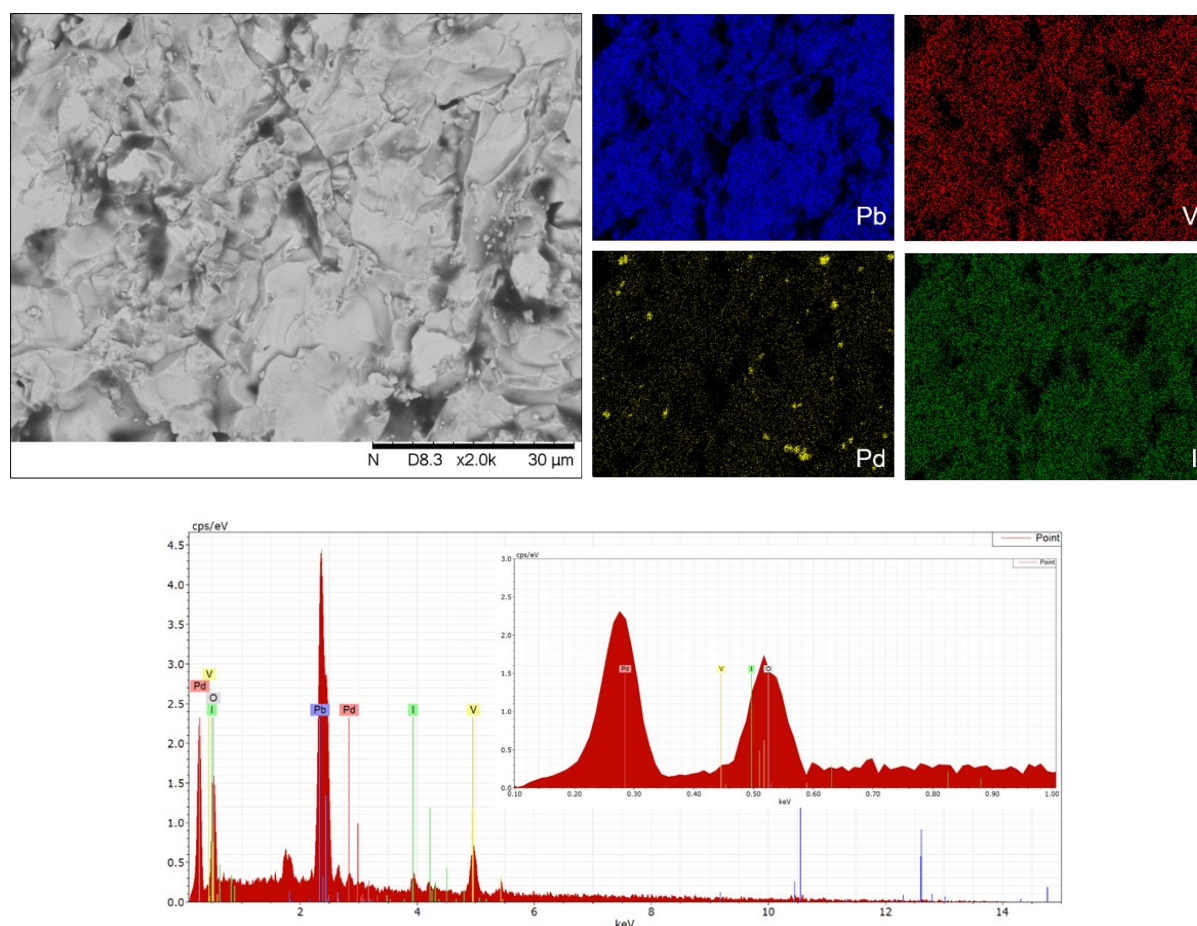

**Figure S1.** SEM-BSE image (x2000 magnification) and EDX elemental distribution plots for Pb, V, Pd, and I of a sectioned pellet of  $\text{PdPb}_9(\text{VO}_4)_6\text{I}_2$  reacted at 700 °C for 5 hr. Scale bar shown at bottom of SEM image represents 30  $\mu\text{m}$ . EDX spectrum corresponds to field of view in SEM-BSE and element distribution maps.

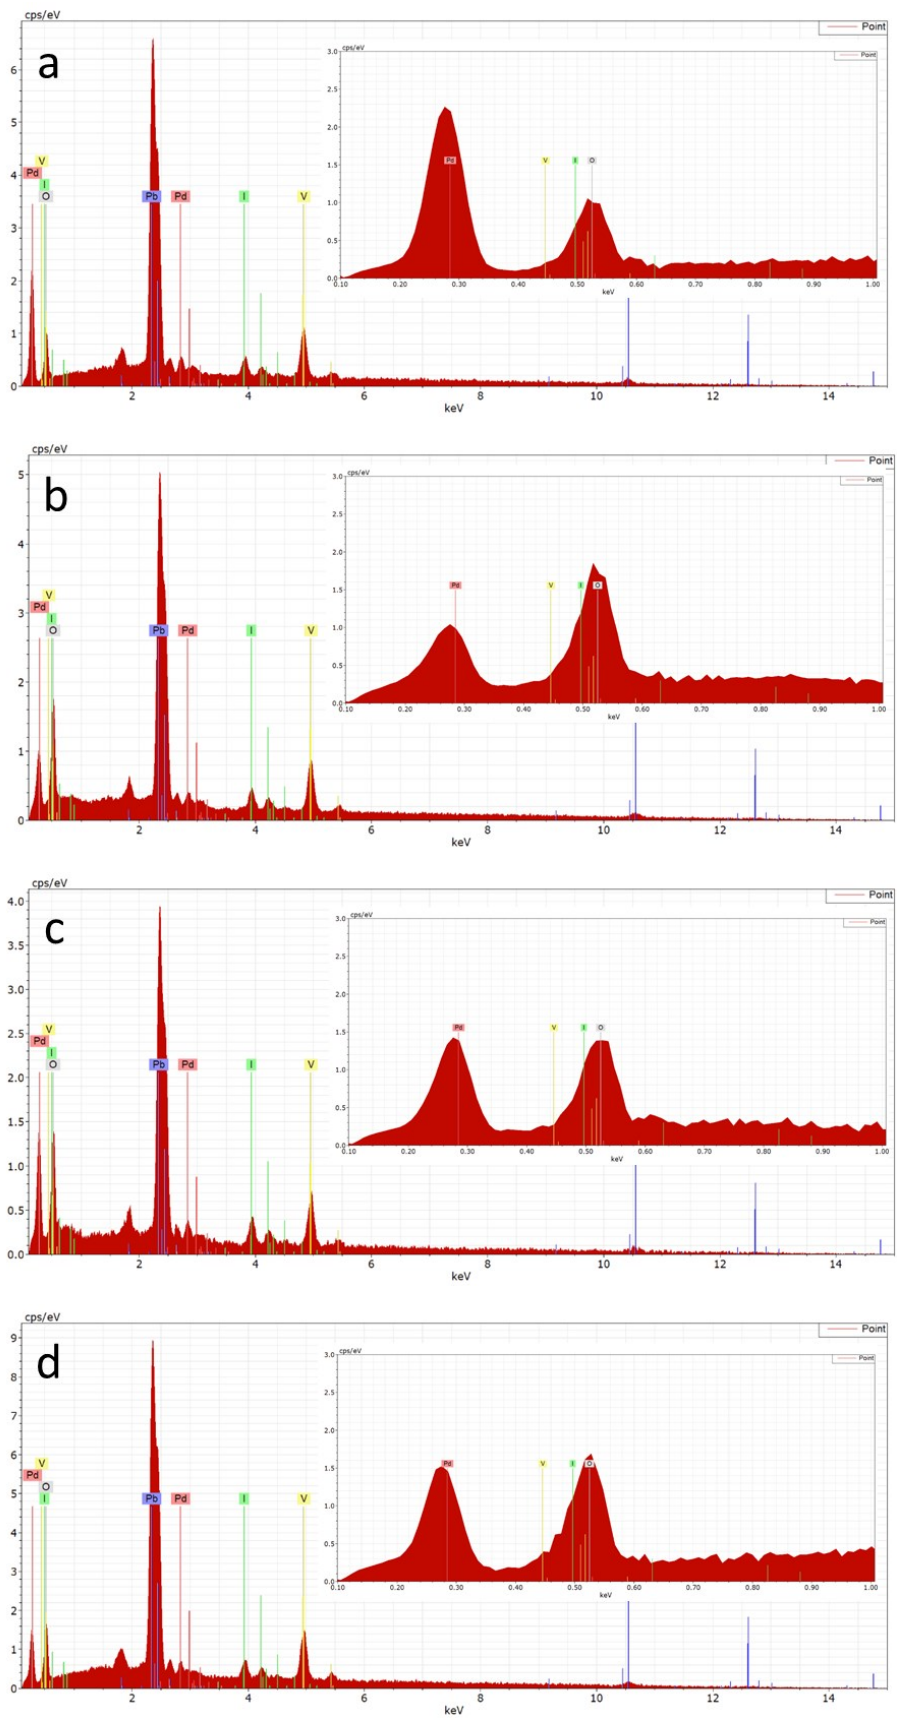

**Figure S2.** EDX spectra corresponding to field of view in SEM-BSE and element distribution maps in: a) Figure 2, b) Figure 7, c) Figure 12, d) Figure 13.

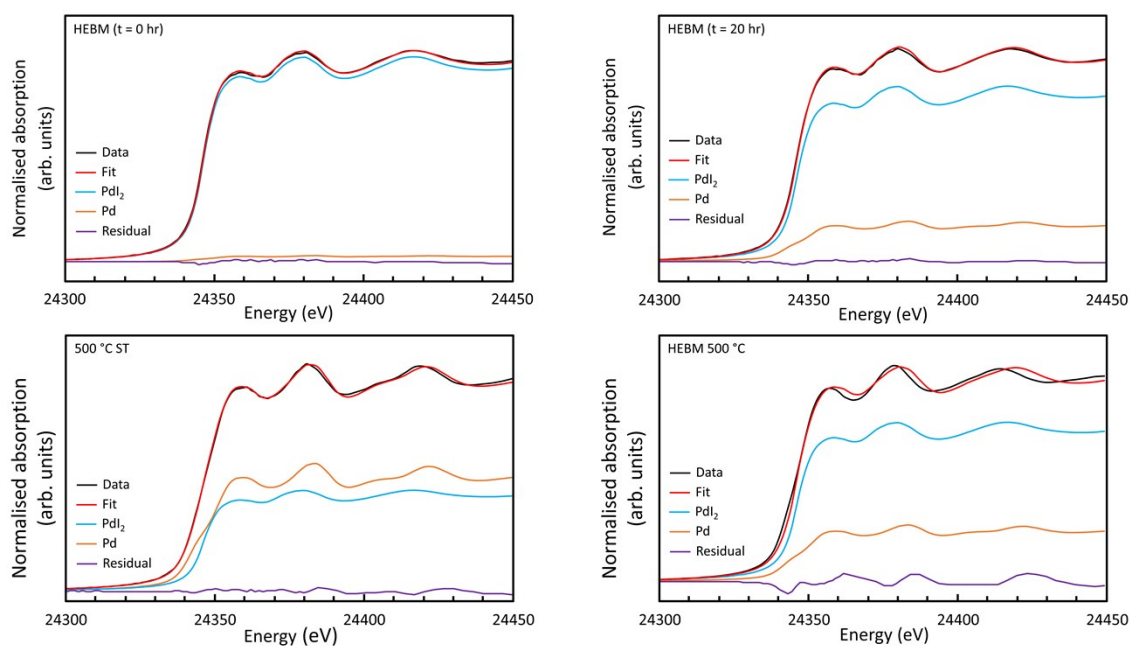

**Figure S3.** Linear combination fits to Pd L<sub>3</sub> XANES data from “PdPb<sub>9</sub>(VO<sub>4</sub>)<sub>6</sub>I<sub>2</sub>” produced by conventional solid state reaction (500°C ST) or High Energy Ball Milling (HEBM), with data shown for initial reaction mixture (HEBM 0hr), after 20 h (HEBM t = 20 hr), and after subsequent reaction at 500°C (HEBM 500°C); plus reference compounds of Pd, PdI<sub>2</sub> and PdO.

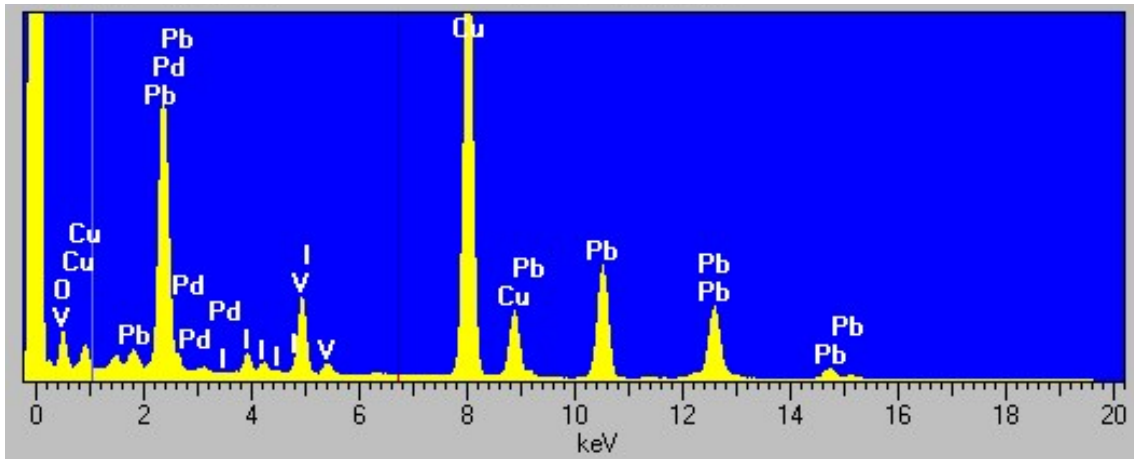

**Figure S4.** TEM-EDX spectrum of a single-grain of “PdPb<sub>9</sub>(VO<sub>4</sub>)<sub>6</sub>I<sub>2</sub>” reacted at 500 °C for 5 hr yielding peaks for Pb, Pd, V, O, and I..

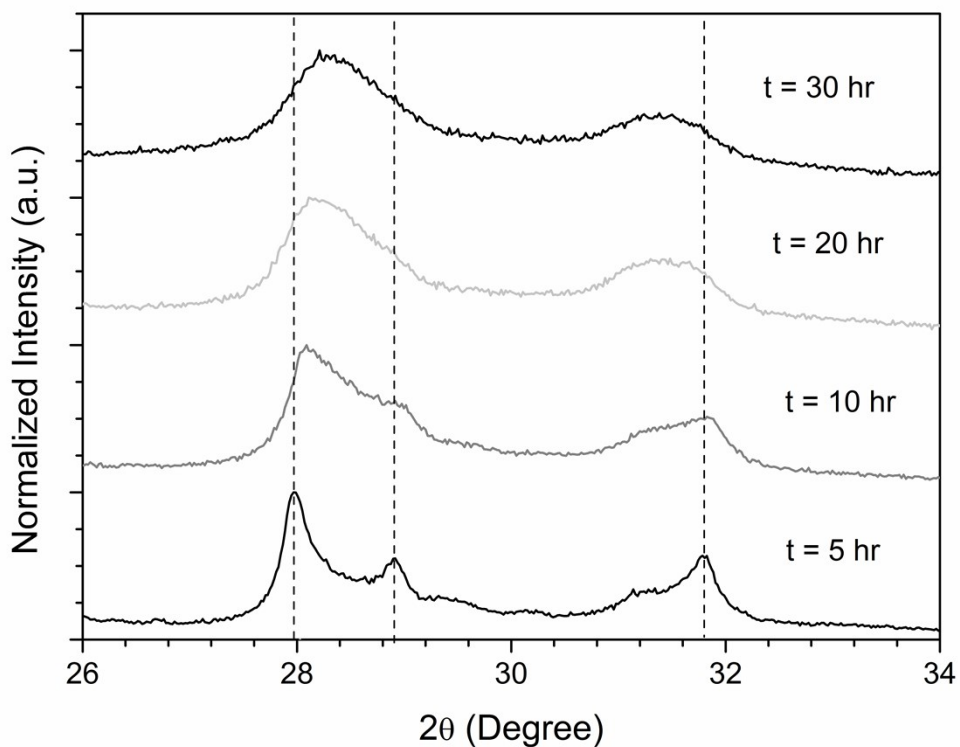

**Figure S5.** Expert from the PXR patterns of batched  $\beta$ -Pb<sub>3</sub>(VO<sub>4</sub>)<sub>2</sub> and PdI<sub>2</sub> subjected to HEBM after t = 5, 10, 20, and 30 hr showing the amorphization and peak shift of the most intense reflections between  $2\theta = 27$  to  $33^\circ$ .

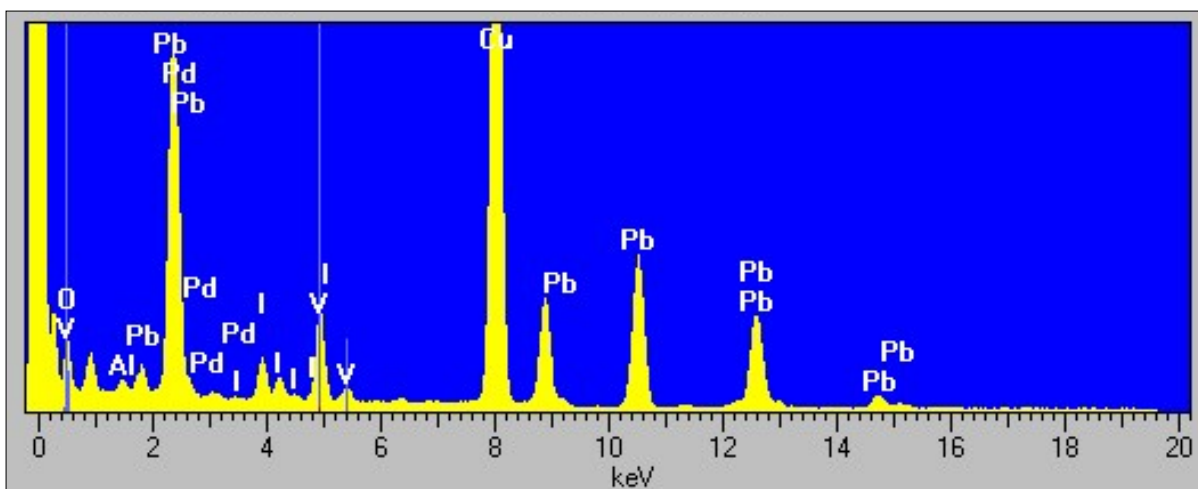

**Figure S6.** TEM-EDX spectrum of a single-grain of HEBM “PdPb<sub>9</sub>(VO<sub>4</sub>)<sub>6</sub>I<sub>2</sub>” reacted at 500 °C for 1 hr yielding peaks for Pb, Pd, V, O, and I.

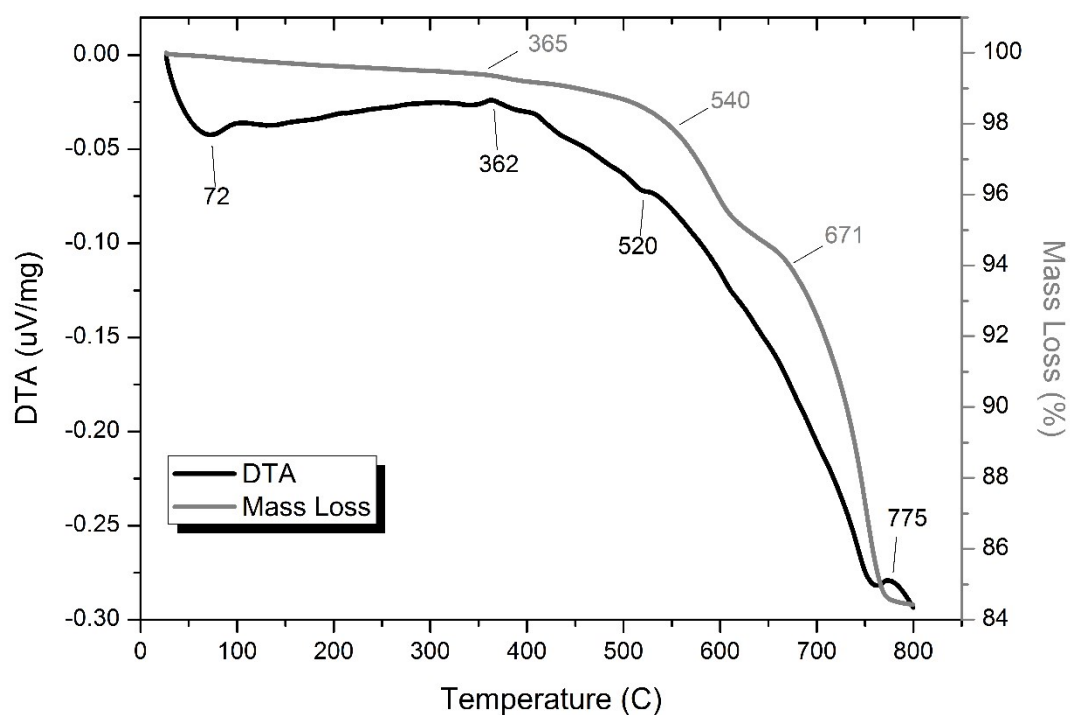

**Figure S7.** TGA-DTA analysis of “PdPb<sub>9</sub>(VO<sub>4</sub>)<sub>6</sub>I<sub>2</sub>” subjected to HEBM 30 hr and reacted at 200 °C for 1 hr in a sealed vessel under vacuum.
